# Supplementary material for: VdERG2 was involved in ergosterol biosynthesis, nutritional differentiation and virulence of Verticillium dahliae
Source: Research Square preprint supplement (doi:10.21203/rs.3.rs-2131818/v1), 2022-10-10
Supplement: Supplementary file 1 [file c8a654619e25c2faffa1c461.docx]

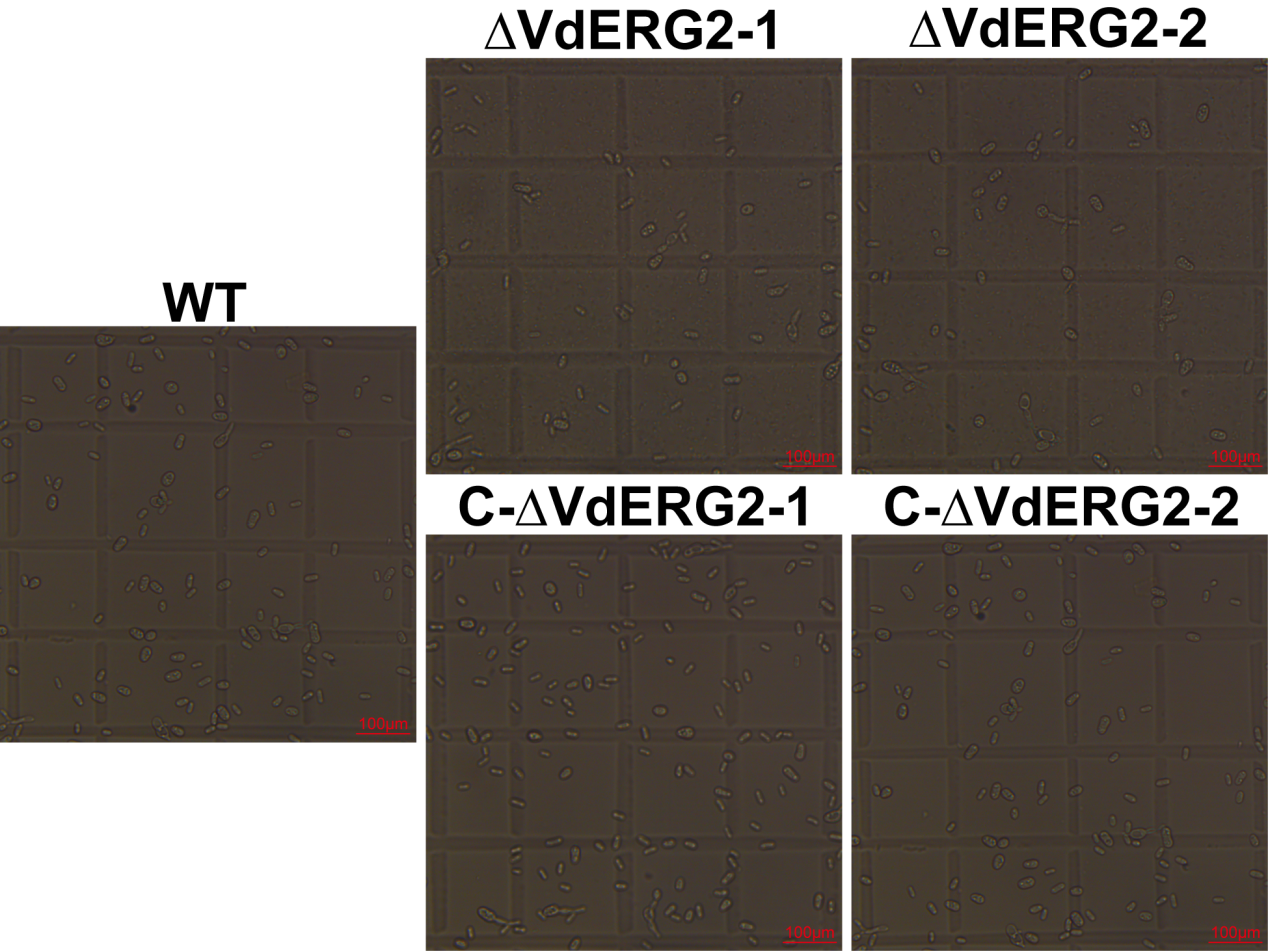


Figure S1: The spore concentrations of wild type, ΔVdERG2 and C-ΔVdERG2 strains cultured in Czapek Dox liquid medium for 5 days were observed under fluorescence microscope.


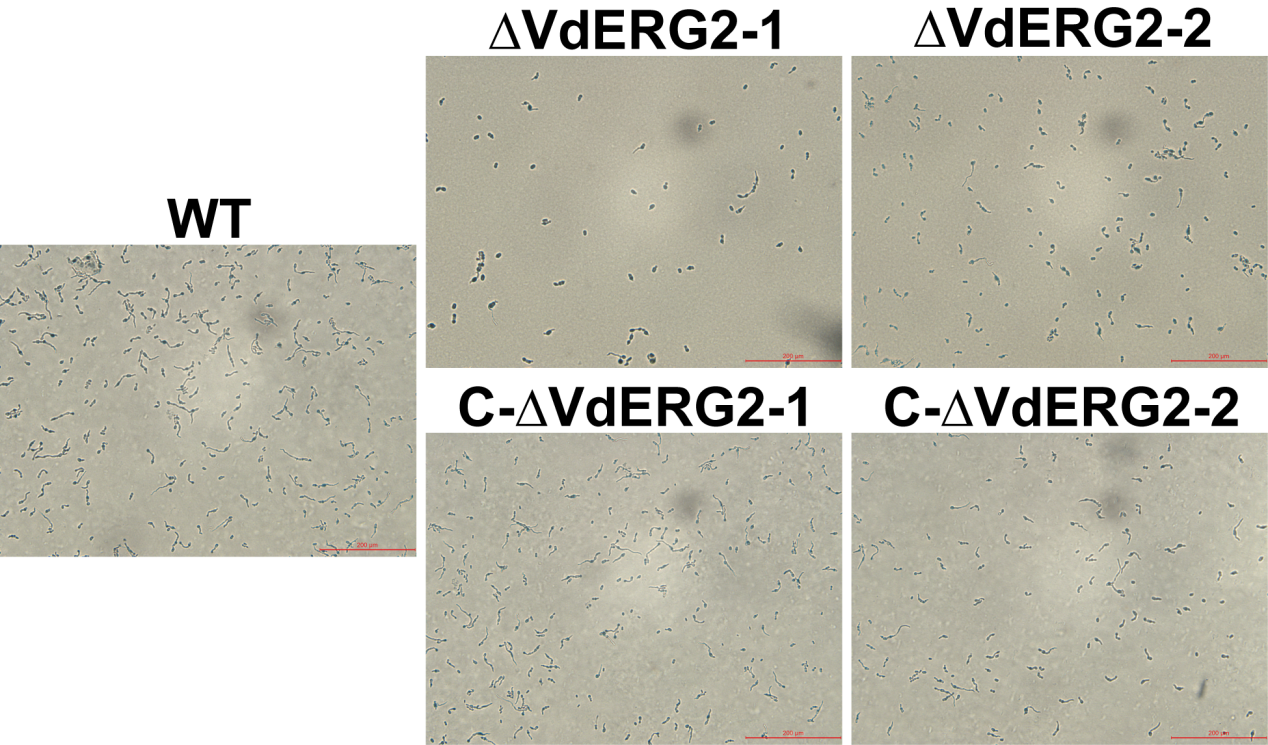


Figure S2: The spore germination rate of wild type, ΔVdERG2 and C-ΔVdERG2 strains cultured in PDA solid medium for 6 h were observed under fluorescence microscope. Scale bar = 200 μm.


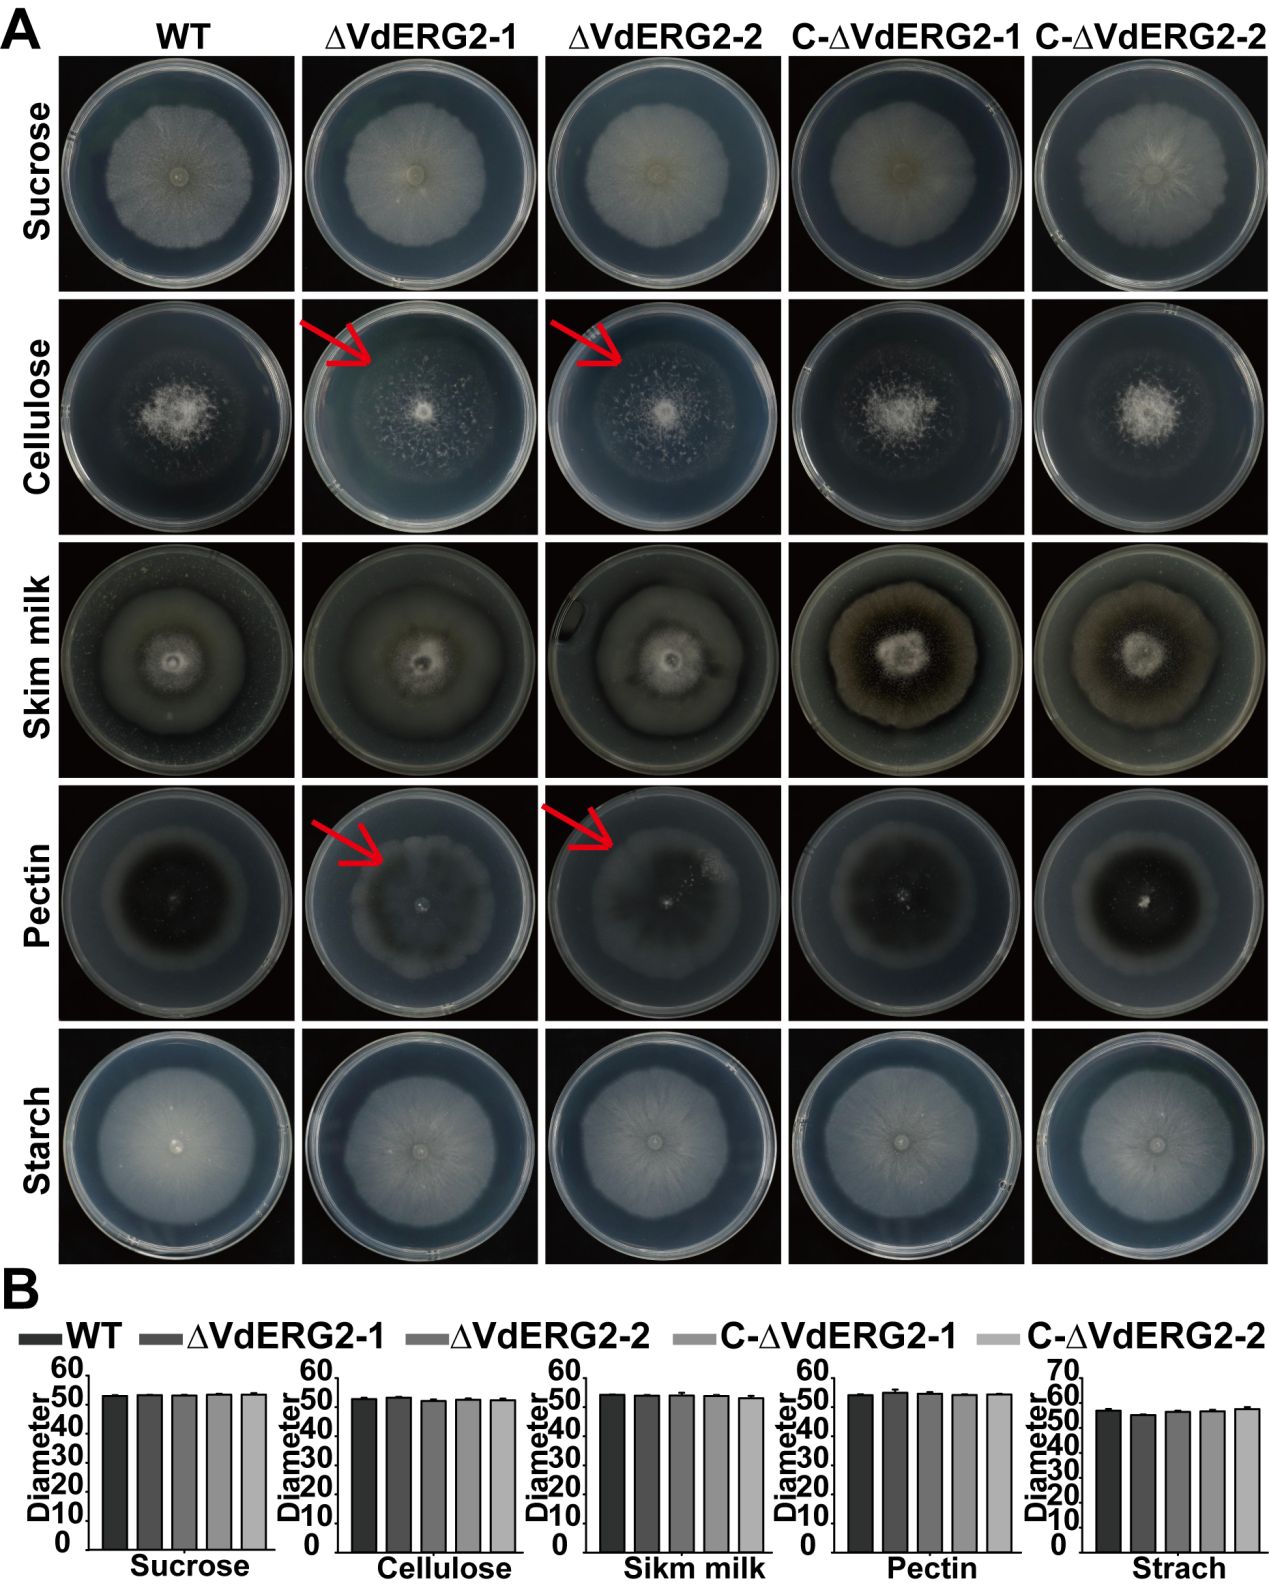


Figure S3: Analysis of wild type, ΔVdERG2 and C-ΔVdERG2 strains growth in different carbon sources medium. (A) Phenotype analysis of the wild type, ΔVdERG2 and C-ΔVdERG2 strains grown on Czapek Dox medium supplemented with 30 g/L sucrose, 5 g/L cellulose, 18 g/L skim milk, 10 g/L pectin, 17 g/L starch without sucrose for 14 days. (B) Colony diameter of the wild type, ΔVdERG2 and C-ΔVdERG2 strains grown on culture medium for 14 days. Values represent means ± standard deviation of three replicates. The asterisks represent statistical differences performed by a t-test in comparison with the wild type strains (*p<0.05, **p<0.01).


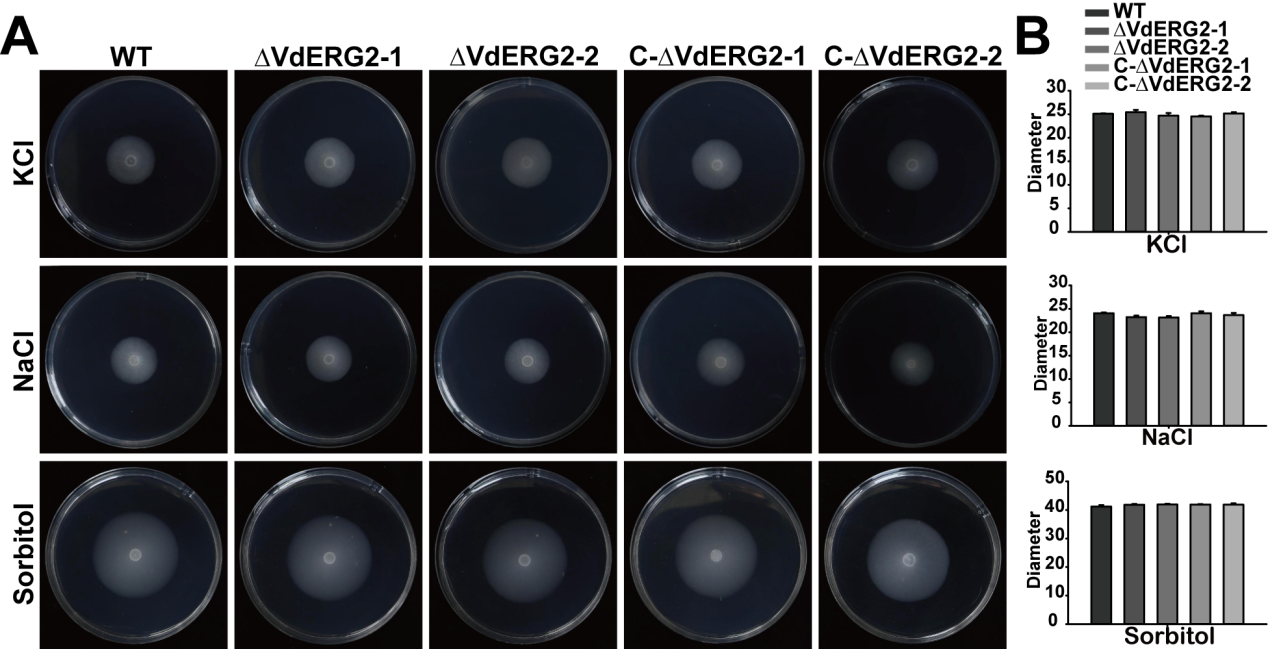


Figure S4: VdERG2 was not involved in osmotic stress. (A) Phenotype analysis of the wild type, ΔVdERG2 and C-ΔVdERG2 strains grown on PDA or PDA supplemented with 1 mol/L KCl, 1 mol/L NaCl and 1 mol/L Sorbitol for 14 days. (B) Colony diameter of the wild type, ΔVdERG2 and C-ΔVdERG2 strains grown on PDA or PDA supplemented with 1 mol/L KCl, 1 mol/L NaCl and 1 mol/L Sorbitol for 14 days. Values represent means ± standard deviation of three replicates. The asterisks represent statistical differences performed by a t-test in comparison with the wild type strains (*p<0.05, **p<0.01, ***p<0.001).

| **Primer name** | **Sequence (5'-3')** | **Purpose** |
| --- | --- | --- |
| pSUC2- VdERG2-EcoR1-F | CGGAATTCATGTCTCCACCGCGCAAC | Yeast signal sequence trap system |
| pSUC2- VdERG2-Xho1-R | CCGCTCGAGGACGACGTAGATAGGGGT |
| *Vd-actin-F* | GTCCATCTTGCCCTCTTTCCA | qRT-PCR analysis in *V. dahliae* |
| *Vd-actin-R* | TCCCTCACCTTCCTTCGGAT |
| *VaflM-q PCR-F* | GACTGTCAATGCCATCGCC |
| *VaflM-q PCR-R* | CGGTGACCTTGATAACTT |
| *VdSCD-qPCR-F* | ATGCCCGCTTCCGAGTTC |
| *VdSCD-qPCR-R* | TTCCACACGCCGTCAATCTT |
| *VdLAC-qPCR-F* | CGTTTCCTCACTTTAGCCACAGC |
| *VdLAC-qPCR-R* | CACCCAGTCCACCGTCCATTTGT |
| *VT4HR-qPCR-F* | TGGTGGCATCAAGACAGACA |
| *VT4HR-qPCR-R* | CGAAGCGAGGAAGCAAACAA |
| *Vayg1-qPCR-F* | GTTGCGACGAGTTCTTGT |
| *Vayg1-qPCR-R* | ACCATCACCTTGCCCATA |
| *VDH1-qPCR-F* | GTCTATTCATCTGGTTCCTCCCTA |
| *VDH1-qPCR-R* | CAAACCTCTTACAATGTTGACGC |
| *Vdβt*-F | AACAACAGTCCGATGGATAATT C | Fungal biomass detection |
| *Vdβt-*R | GTACCGGGCTCGAGATCG |
| *GhUB7*-F | GAAGGCATTCCACCTGACCAAC |
| *GhUB7*-R | CTTGACCTTCTTCTTCTTGTGCTTG |
| B303-*VdERG2*-Up-Kpn1-F | GGACCGGACGGGGCGGTACCCACGACCTCGGCACCAAGGT | Generation of *VdERG2* knockout and complemented mutants in *V. dahliae* |
| B303-*VdERG2*-Up-R | CTTCAATATCAGTTAACGTCGCTTTGTCCTGGTCTGGCAC |
| B303-*VdERG2*-HPH-F | GTGCCAGACCAGGACAAAGCGACGTTAACTGATATTGAAG |
| B303-*VdERG2*-HPH-R | TCCGGCTCATCCGCGCAAACCTATTCCTTTGCCCTCGGACG |
| B303-*VdERG2*-Down-F | CGTCCGAGGGCAAAGGAATAGGTTTGCGCGGATGAGCCGGA |
| B303-*VdERG2*-Down-Pac1-R | TAGTCCCGGGTCTTAATTAACACCGTGTCGCCAACCTGCT |
| 1. *VdERG2*-Xba1-F | GACAGCCCGCAAACTCTAGAGAGGCCGCCGTCAACAAGCA |
| 1302-*VdERG2*-Xho1-R | ATTATTATGGAGAAACTCGAGATGTCTCCACCGCGCAACAA |
| *VdERG2*-F | ATGTCTCCACCGCGCAAC |
| *VdERG2*-R | GAACTTGCCCTTCAGGAG |
| *HPH*-F | ATTTGTGTACGCCCGACAGT |
| *HPH*-R | GTGCTTGACATTGGGGAATT |
| *HPH*-southern-F | ATTTGTGTACGCCCGACAGT | For southern blotting |
| *HPH*-southern-R | GTGCTTGACATTGGGGAATT |

**Table S1. Primers used in this study**

Note: Underline for restriction site , and italics for genes or species.
